# Supplementary material
Source: PubMed Central journal article supplement (PMC6263834)
Supplement: NIHMS978108-supplement-Supp_figS1-7.pdf [file NIHMS978108-supplement-Supp_figS1-7.pdf]

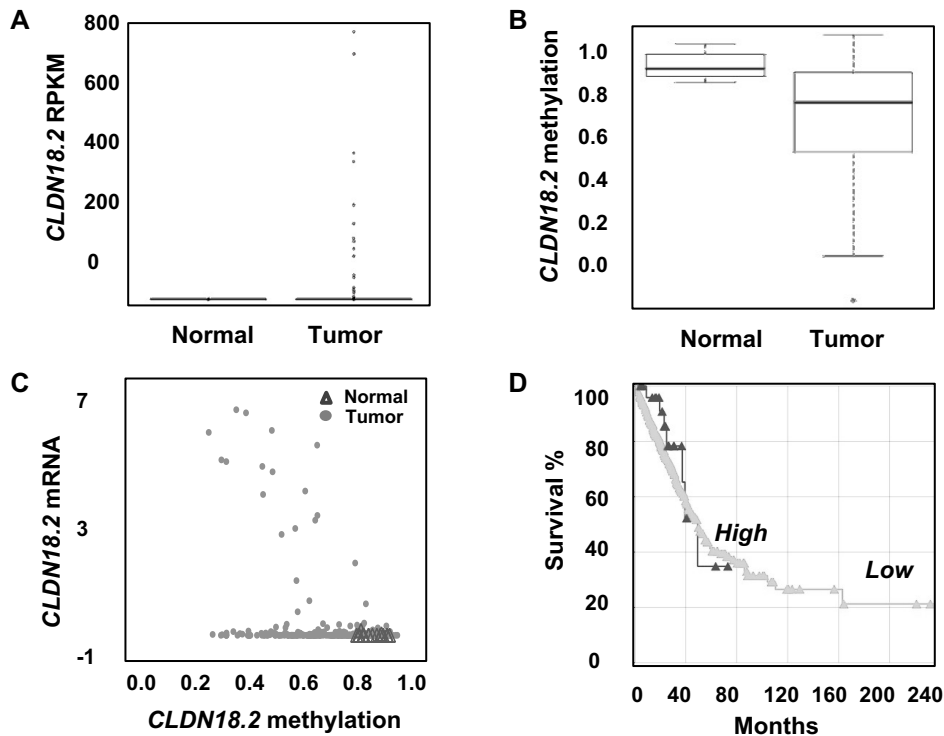

**Supplementary Figure 1. A small fraction of LuAd patients express *CLDN18.2* which is associated with decreased promoter methylation but not with patient mortality.** **A.** *CLDN18.2* mRNA expression in normal and LuAd tumor samples. RNA-seq data are from 286 LuAd samples and 19 adjacent non-tumor tissues (\*,  $p < 0.05$ , unpaired two-tailed t-test). Reads per kilobase of transcript (RPKM) is used as expression unit. **B.** Methylation of the *CLDN18.2* promoter in the TCGA LuAd patient cohort. Data are from 286 LuAd samples and 19 adjacent non-tumor tissues, with boxes representing the 25% to 75% quartiles and lines within the boxes depicting median values. Data are for probe cg17298704 (\*,  $p < 0.0001$ , unpaired two-tailed t-test). **C.** Analysis of the correlation between *CLDN18.2* mRNA expression and methylation of CpGs in the promoter region ( $r = -0.335875$ ,  $p < 0.0001$ ). **D.** Kaplan-Meier curves for 502 patients in the TCGA LuAd cohort of *CLDN18.2* ( $p = 0.05$ , log-rank test).

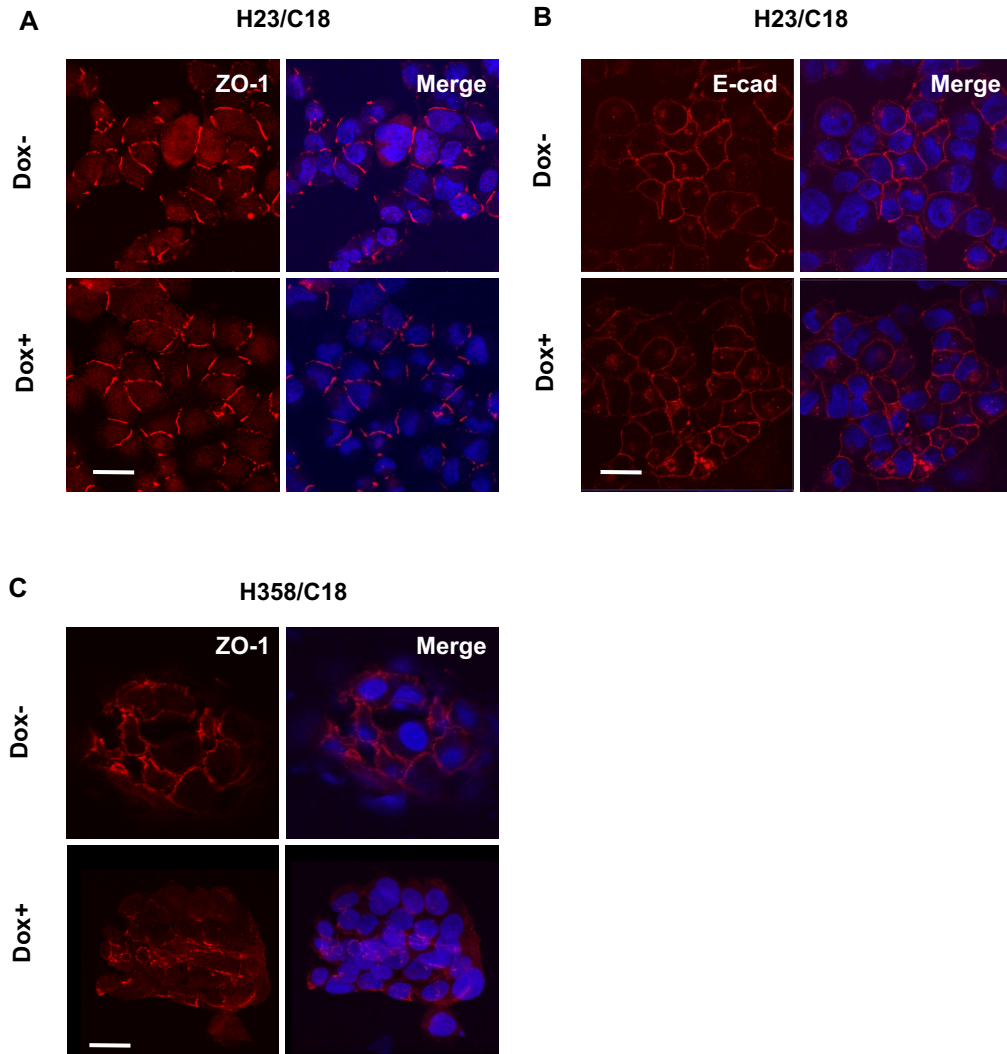

**Supplementary Figure 2. Expression of CLDN18.1 does not change intracellular distribution of junctional proteins in H23 and H358 cells. A-B.** Immunofluorescence staining of ZO-1 and E-cadherin in H23/C18 cell cultures treated with Dox or vehicle. Bar = 5  $\mu$ m, n = 1. **C.** Immunofluorescence staining of ZO-1 in H358/C18 cells treated with Dox (1  $\mu$ g/ml) or vehicle. Bar = 5  $\mu$ m, n = 1.

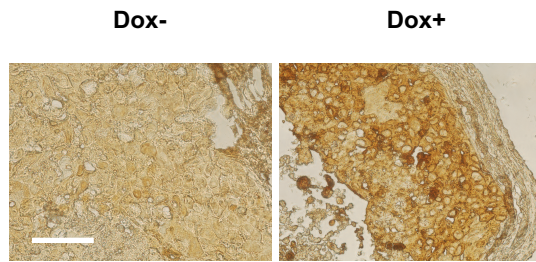

**Supplementary Figure 3.** Immunohistochemical (IHC) staining of CLDN18 in the isolated H23/C18 xenografted tumor. Bar = 200  $\mu$ m, n = 1.

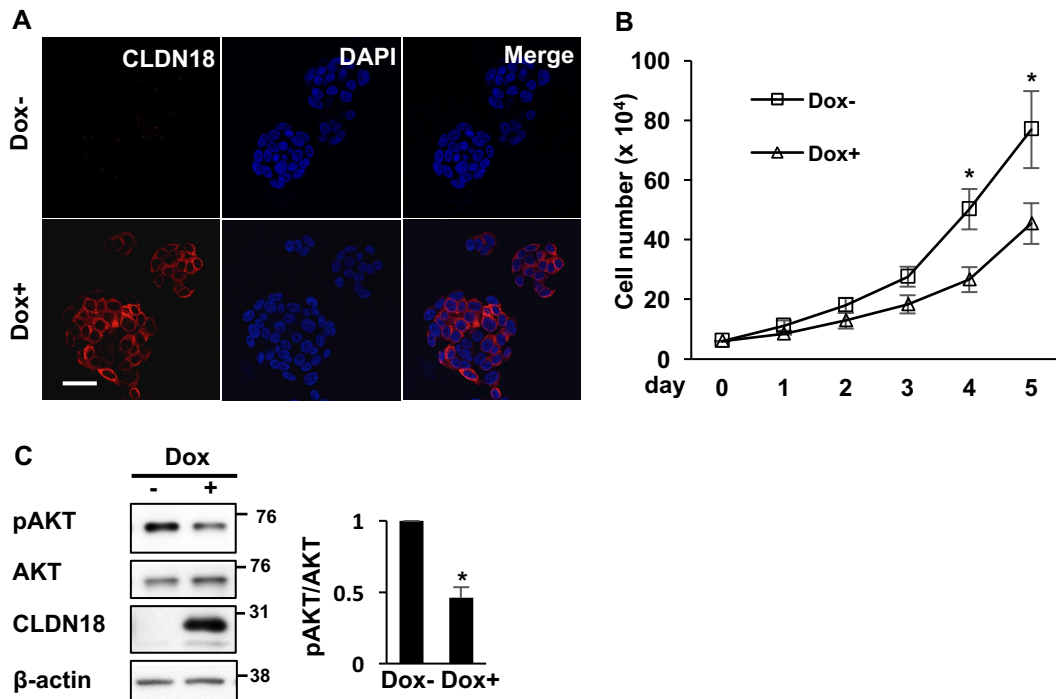

**Supplementary Figure 4. *CLDN18.1* inhibits proliferation and AKT phosphorylation in H358/C18 cell cultures.** **A.** Immunofluorescence staining of CLDN18 in H358/C18 cell cultures treated with Dox (1 µg/ml) or vehicle. Bar = 10 µm. **B.** Cell number was counted on days 1-5. \* indicates  $p < 0.05$  compared to no Dox treatment at the same time point,  $n = 3$ , two-way ANOVA. **C.** Representative western analysis and quantitation of AKT phosphorylation in Dox-treated H358/C18 cells,  $n = 4$ .

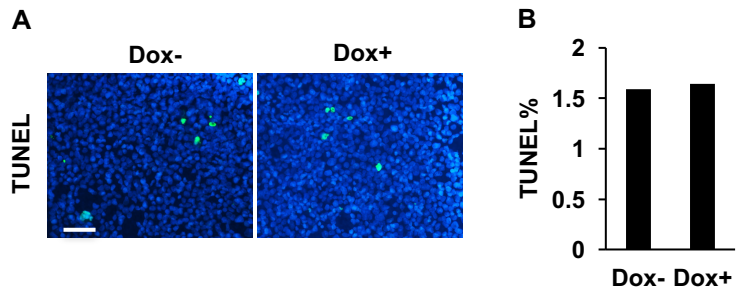

**Supplementary Figure 5. *CLDN18.1* does not affect apoptosis.** TUNEL staining (A) and quantitation (B) in H23/C18 cells treated with Dox or vehicle. Bar = 50  $\mu$ m, n =1.

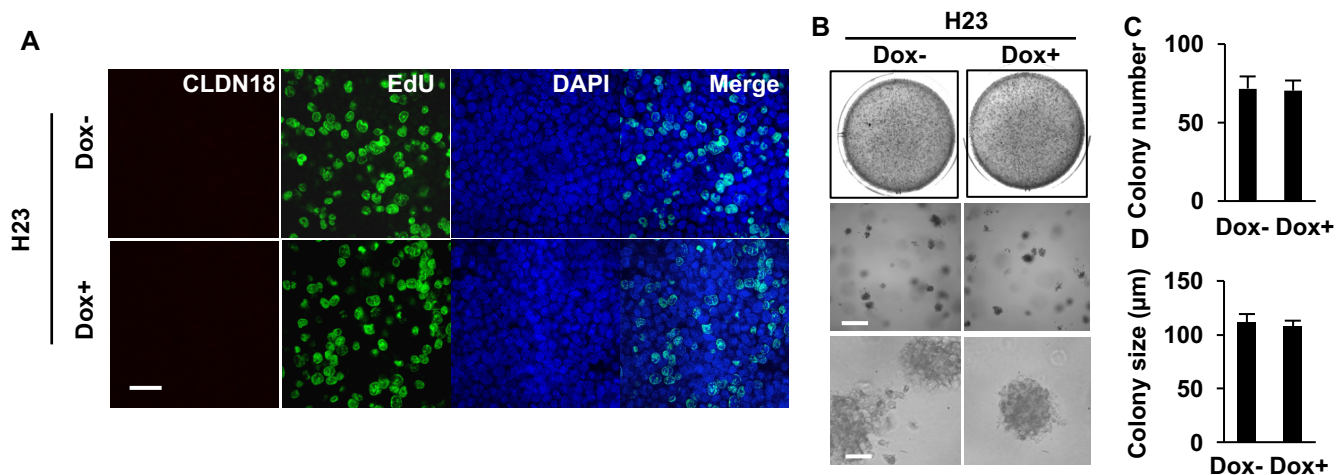

**Supplementary Figure 6. Dox does not affect proliferation or soft agar colony formation by parental H23 cells.** **A.** Fluorescence images of EdU<sup>+</sup> (green) labeling of H23 cells treated with Dox or vehicle. Bar = 20 μm, n = 1. **B-D.** Colonies formed in soft agar by H23 cells in the presence or absence of Dox are shown at low (top, whole well), medium (middle, bar = 200 μm) and high magnification (bottom, bar = 50 μm). Results are quantitated for colony number (C) and size (D). n = 3, unpaired two-tailed t-test.

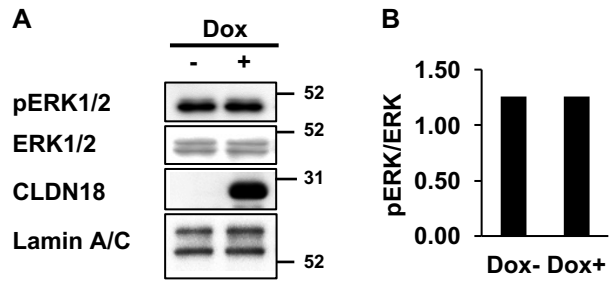

**Supplementary Figure 7.** Western (A) and quantitative analysis (B) demonstrate that Dox-induced CLDN18.1 expression in H23/C18 cells does not affect ERK1/2 phosphorylation. n = 1. Western blot data shown in figures 4D, 5B and S7A of the manuscript are from the same experiment.
